# Supplementary material for: Strong multi-functions based on conjugating chondroitin sulfate onto an amine-rich surface will direct the vascular cell fate for cardiovascular implanted devices
Source: Royal Society of Chemistry journal article supplement (doi:10.1039/c7tb02162c), 2017-01-01
Supplement: c7tb02162c1.pdf [file c7tb02162c1.pdf]

## Electronic Supplementary Information

### Strong Multi-functions Based on Conjugating Chondroitin Sulfate on Amine-rich Surface Direct Vascular Cells Fate for Cardiovascular Implanted Devices

Jingan Li<sup>1,\*,#</sup>, Dan Zou<sup>1,#</sup>, Kun Zhang<sup>1,2,\*</sup>, Xiao Luo<sup>1</sup>, Ping Yang<sup>1,\*</sup>,  
Yuying Jing<sup>2</sup>, Yuxuan Zhang<sup>2</sup>, Guilin Cui<sup>2</sup>, Nan Huang<sup>1</sup>

<sup>1</sup>Key Lab. for Advanced Technologies of Materials, Ministry of Education, School of Material  
Science and Engineering, Southwest Jiaotong University, Chengdu 610031, PR China

<sup>2</sup>School of Life Science, Zhengzhou University, 100 Science Road, Zhengzhou 450001, PR China

\*Corresponding author: Tel: +86 18539956211; Fax: +86 28 87600625.

E-mail addresses: 4828713@qq.com (J. A. Li), zhangkun@zzu.edu.cn (K. Zhang),  
yangping8@263.net (P. Yang)

# Joint first authors

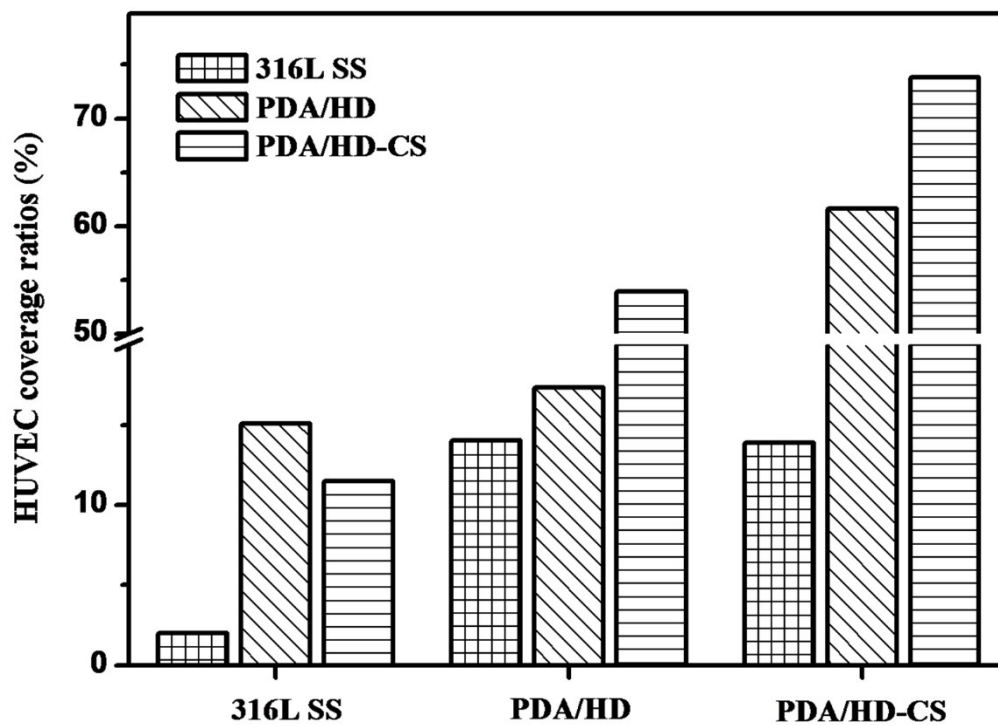

**Figure S1.** Coverage ratios of HUVEC on PDA/HD-CS, PDA/HD, and 316L SS after culture for 4 h, 1 day and 3 days, respectively.
